# Supplementary material for: Biopsychological structure of Yin-Yang using Cloninger’s Temperament model and Carver and White’s BIS/BAS scale
Source: PeerJ. 2016 May 18;4:e2021. doi: 10.7717/peerj.2021 (PMC4878383; doi:10.7717/peerj.2021)
Supplement: Supplemental Information 1 [file peerj-04-2021-s001.xlsx]

## Sheet: Sheet1
sex	Age	Educ	SPQB	SPQE	SPQC	SPQ	BASD	BASFS	BASRR	BAS	BIS	NS	HA	RD	P	SPQgroup
2	35	3	11	5	9	25	8	10	16	34	19	22	30	45	46	3
2	26	2	8	7	12	27	9	15	13	37	9	41	20	24	46	3
1	31	3	8	5	11	24	13	11	17	41	20	31	32	36	54	4
2	27	2	10	8	10	28	11	13	16	40	20	30	33	44	39	3
2	24	2	13	7	9	29	12	15	17	44	15	52	28	67	49	3
2	27	2	11	7	11	29	10	12	15	37	22	48	41	47	36	3
1	25	2	12	6	9	27	9	11	15	35	16	17	28	48	62	3
1	32	3	7	5	6	18	6	7	10	23	17	19	34	32	54	4
1	37	3	8	5	5	18	12	10	18	40	23	29	26	54	51	4
1	34	2	8	6	9	23	14	12	14	40	15	34	56	38	49	4
1	26	2	11	10	9	30	11	8	16	35	21	29	36	53	59	2
2	30	3	11	8	7	26	11	8	15	34	26	22	43	57	43	3
1	39	2	11	6	9	26	10	13	16	39	21	32	38	52	59	3
1	26	2	9	10	11	30	13	12	18	43	20	41	45	42	41	2
2	25	2	13	7	9	29	12	12	15	39	20	29	28	48	52	3
2	25	2	9	8	10	27	8	12	15	35	23	30	45	55	30	3
2	25	2	8	10	6	24	9	10	14	33	24	35	62	49	35	4
1	35	2	12	8	12	32	8	11	16	35	18	34	24	54	53	2
2	25	2	10	10	7	27	9	11	19	39	25	31	69	50	49	3
1	27	2	8	6	9	23	9	9	14	32	21	25	42	39	50	4
1	43	2	13	5	11	29	13	14	16	43	20	42	31	48	61	3
1	27	2	8	6	9	23	12	8	13	33	20	27	45	39	47	4
2	24	2	14	8	12	34	13	15	19	47	19	54	27	55	55	2
1	29	3	12	10	10	32	12	13	15	40	19	43	39	50	47	2
1	39	3	8	7	5	20	13	14	16	43	19	47	54	46	52	4
2	23	2	14	9	11	34	11	10	19	40	28	28	46	66	56	2
1	26	2	6	7	5	18	9	10	17	36	23	28	48	57	37	4
2	26	2	5	8	7	20	12	12	15	39	20	35	53	42	47	4
1	33	3	9	5	7	21	10	8	13	31	20	20	30	44	42	4
2	31	3	12	7	13	32	15	13	14	42	18	40	22	35	42	2
1	30	2	8	5	7	20	10	14	17	41	17	45	30	50	50	4
1	27	2	5	5	12	22	8	12	13	33	18	46	51	28	30	4
1	41	3	8	5	8	21	10	11	14	35	20	42	53	44	51	4
1	32	2	8	10	6	24	8	14	16	38	18	42	50	29	37	4
1	29	2	8	5	7	20	9	7	16	32	26	21	61	39	27	4
1	34	3	10	9	10	29	11	12	18	41	21	33	44	43	45	3
2	27	2	13	8	8	29	10	12	15	37	20	25	10	63	48	3
1	38	2	9	7	10	26	14	12	17	43	19	30	52	48	62	3
2	30	2	7	11	12	30	14	15	17	46	22	56	60	47	48	2
2	23	2	7	6	9	22	12	10	17	39	24	38	48	30	49	4
1	27	2	10	9	9	28	14	14	12	40	15	42	37	47	62	3
1	28	2	12	7	8	27	13	14	16	43	17	41	27	51	55	3
2	24	2	9	6	9	24	11	9	16	36	20	25	31	54	48	4
1	25	2	11	10	9	30	12	13	18	43	23	30	48	44	57	2
1	25	2	12	5	9	26	14	16	19	49	19	53	25	40	64	3
2	26	2	15	7	12	34	14	10	16	40	17	33	26	59	57	2
1	40	2	13	6	9	28	10	8	17	35	19	31	34	43	51	3
2	31	3	10	7	9	26	11	8	14	33	17	20	36	54	45	3
1	36	2	5	7	5	17	6	10	13	29	24	20	61	25	19	4
2	30	2	11	4	11	26	11	12	19	42	17	27	21	47	52	3
2	26	2	11	12	9	32	8	12	16	36	22	41	33	59	54	2
2	33	3	10	8	9	27	10	11	13	34	24	22	41	42	44	3
1	28	2	12	7	9	28	12	12	20	44	24	38	34	45	54	3
1	30	2	13	8	9	30	11	12	14	37	19	38	37	50	40	2
2	30	3	15	10	13	38	15	16	20	51	23	34	33	62	44	2
2	26	3	14	12	12	38	10	13	17	40	22	52	41	60	55	2
2	36	2	6	11	10	27	8	11	15	34	23	27	61	27	34	3
1	31	3	11	9	12	32	16	16	20	52	17	37	27	42	59	2
2	26	2	7	5	9	21	8	12	15	35	19	31	35	46	45	4
2	32	3	8	7	10	25	12	12	18	42	22	32	22	51	45	3
1	32	2	12	5	10	27	11	10	15	36	14	41	29	43	47	3
1	27	2	12	7	13	32	9	12	13	34	17	20	19	46	54	2
1	31	2	13	6	8	27	11	11	16	38	15	54	40	49	49	3
2	26	2	10	6	11	27	10	11	13	34	19	29	39	46	51	3
1	36	2	8	6	11	25	9	10	14	33	15	44	28	33	29	3
2	30	3					11	10	15	36	20	20	39	39	56
2	25	3	15	11	11	37	11	10	14	35	20	32	26	67	72	2
2	28	3	13	12	15	40	13	13	17	43	18	49	46	40	34	2
2	35	3	15	11	11	37	8	12	16	36	22	33	25	68	59	2
1	29	2	10	7	10	27	11	11	16	38	20	28	37	45	49	3
1	31	2	6	7	9	22	7	9	13	29	18	11	42	36	33	4
1	28	3	12	6	8	26	13	14	20	47	27	40	36	54	61	3
1	30	3					12	12	13	37	18	34	36	50	49
1	33	2					11	11	18	40	23	39	40	41	48
2	26	2	5	9	10	24	9	6	18	33	24	18	56	43	40	4
2	31	3	15	8	10	33	9	8	12	29	24	13	50	41	38	2
2	32	2	7	6	12	25	12	15	18	45	21	39	44	40	40	3
1	30	2	6	6	6	18	6	9	12	27	18	25	53	26	35	4
2	35	3					11	12	13	36	16	26	34	38	36
2	31	3	8	5	8	21	12	12	16	40	23	25	25	59	64	4
2	25	2	9	10	10	29	10	14	18	42	24	29	52	59	38	3
1	28	2	12	5	9	26	10	11	15	36	19	26	19	39	51	3
2	34	3	9	8	8	25	16	8	17	41	26	20	61	47	46	3
1	28	3	12	8	12	32	14	13	16	43	16	42	28	53	52	2
2	27	3	11	6	11	28	12	15	17	44	25	40	28	37	37	3
2	29	3	7	5	8	20	11	12	16	39	13	28	31	51	52	4
1	30	2	10	4	12	26	12	15	11	38	9	46	11	29	56	3
2	33	3	11	5	11	27	10	13	15	38	18	33	30	50	44	3
2	28	3	10	6	7	23	10	9	16	35	27	31	50	48	55	4
1	32	2	7	5	7	19	12	11	17	40	22	30	47	45	45	4
2	30	2	10	5	9	24	10	7	16	33	21	23	40	53	31	4
2	27	3	10	9	9	28	10	11	18	39	22	39	39	61	53	3
1	37	3	10	6	9	25	10	10	16	36	19	20	35	49	39	3
2	31	2					10	9	17	36	23	32	38	57	42
2	26	3	8	5	14	27	10	13	14	37	14	37	28	38	48	3
1	36	3	9	5	7	21	6	8	18	32	26	18	45	39	51	4
2	31	2	13	8	9	30	10	14	18	42	26	46	28	59	52	2
2	25	3	8	7	8	23	6	9	16	31	21	27	39	52	28	4
1	25	2	12	5	10	27	13	8	20	41	20	32	26	51	67	3
2	26	2	10	6	9	25	13	15	20	48	21	31	42	32	57	3
2	30	2	11	10	15	36	8	11	15	34	20	29	33	41	54	2
2	30	3	10	12	10	32	11	10	17	38	21	32	28	42	53	2
2	29	2	6	4	12	22	11	9	15	35	23	31	35	57	52	4
2	27	3	13	7	13	33	14	14	18	46	27	38	55	43	43	2
1	31	2	12	11	15	38	9	9	12	30	27	27	36	42	55	2
2	37	2	7	9	7	23	8	10	14	32	17	32	32	45	35	4
2	29	2	11	9	8	28	8	8	10	26	16	26	41	46	42	3
1	31	2	15	9	14	38	11	9	15	35	19	33	42	46	49	2
2	28	2	8	11	10	29	10	12	14	36	16	32	36	47	51	3
1	28	2	13	8	7	28	13	15	16	44	28	42	55	36	26	3
1	43	3	10	10	14	34	11	12	15	38	18	41	35	40	49	2
1	44	2	5	12	7	24	10	9	13	32	16	28	26	55	41	4
2	27	2	14	11	13	38	9	12	18	39	23	31	49	36	43	2
1	29	3	9	7	10	26	8	14	18	40	16	46	22	58	37	3
2	37	2	11	9	12	32						32	33	48	52	2
2	26	2	9	4	13	26	9	10	17	36	25	37	42	57	40	3
2	35	3	12	9	13	34	10	9	15	34	20	19	47	40	38	2
2	33	2	5	9	7	21	8	10	14	32	19					4
2	28	2	6	10	13	29	12	16	19	47	23	55	43	55	62	3
2	31	2	12	10	14	36	7	7	16	30	23	11	48	45	40	2
1	40	3	6	4	5	15	10	13	14	37	18	49	23	49	34	4
1	29	3	7	8	6	21	10	11	15	36	14	33	28	60	35	4
1	33	2	5	4	8	17	13	15	20	48	21	51	37	57	50	4
2	27	2	12	9	14	35	10	11	18	39	27	25	50	45	39	2
2	30	2	11	9	11	31	11	13	17	41	20	35	40	35	56	2
1	38	3	12	11	13	36						31	44	43	43	2
2	29	2	9	7	15	31						12	33	48	45	2
1	31	2	7	8	8	23	10	11	15	36	18	27	27	48	51	4
1	35	2	8	12	12	32						17	19	36	59	2
1	30	2	9	7	10	26	10	12	16	38	21	41	35	52	37	3
1	29	2	9	11	12	32	12	13	16	41	17	39	23	40	63	2
1	39	3	8	9	9	26						31	35	35	44	3
1	37	3	14	9	13	36	10	11	14	35	20	40	27	48	54	2
1	30	3	7	9	12	28	9	8	11	28	15	20	28	54	58	3
2	26	2	11	7	10	28	9	10	16	35	25	21	38	47	47	3
1	26	2	7	9	12	28	9	11	19	39	23	31	40	51	54	3
2	28	2	12	12	11	35	12	9	16	37	25	29	47	47	72	2
2	26	2	13	8	10	31	9	9	17	35	22	30	62	40	30	2
2	32	2	6	9	8	23	11	11	13	35	17	28	24	36	55	4
1	36	3	10	11	12	33	11	13	17	41	16	18	24	40	45	2
1	32	3	6	6	6	18	9	13	14	36	16	47	25	50	51	4
2	32	3	5	12	10	27	11	11	17	39	13					3
1	29	2	11	6	10	27	9	10	14	33	14	29	32	43	41	3
2	23	2	6	5	8	19	10	9	16	35	25	18	58	41	41	4
2	28	2	7	8	8	23	9	8	19	36	26	29	48	43	37	4
1	28	2	9	8	9	26	10	12	17	39	21	34	43	38	39	3
1	35	2	7	5	7	19	9	7	11	27	20	28	53	43	43	4
1	24	2	11	7	7	25	13	13	19	45	21	42	45	44	54	3
2	26	2	10	10	8	28	10	10	17	37	21	29	46	57	38	3
2	29	2	7	6	8	21	10	13	14	37	21	20	53	37	33	4
2	41	3	8	7	8	23	11	9	15	35	23	20	47	37	47	4
2	24	2	14	10	10	34	14	14	18	46	20	54	18	60	61	2
1	25	2	12	6	11	29	10	11	15	36	18	32	29	49	54	3
1	28	2	11	7	8	26	10	9	14	33	24	29	44	56	48	3
2	32	2	8	5	5	18	10	11	18	39	25	28	60	37	56	4
2	27	2	15	9	10	34	11	12	16	39	22	37	36	49	54	2
2	28	2	10	9	11	30	10	15	18	43	17	50	32	42	25	2
2	31	2	14	11	10	35	11	10	14	35	16	35	34	36	36	2
1	34	2	10	5	10	25	11	11	18	40	22	30	42	44	50	3
2	23	2	15	12	14	41	14	15	20	49	18	59	6	48	62	2
2	21	2	12	4	10	26	8	9	11	28	12	24	24	40	44	3
2	26	2	5	7	12	24	15	14	20	49	22	49	63	61	54	4
2	27	2	15	10	13	38	16	14	20	50	15	45	19	60	67	2
1	27	2	13	9	11	33	11	13	17	41	22	30	40	57	51	2
1	26	2	15	9	12	36	12	13	15	40	16	41	23	49	43	2
2	27	2	12	8	11	31	11	8	14	33	20	30	35	55	53	2
2	25	2	10	5	6	21	11	8	16	35	24	27	54	53	56	4
2	30	2	12	8	8	28	12	11	17	40	21	30	33	45	49	3
1	31	2	8	8	9	25	9	10	14	33	20	21	40	43	31	3
1	27	2	10	6	11	27	12	10	16	38	20	33	45	52	59	3
1	29	3	7	5	11	23	12	10	15	37	15	34	34	36	51	4
2	29	3	11	4	10	25	14	12	19	45	19	35	32	34	59	3
2	29	2	6	4	6	16	9	8	15	32	17	15	39	38	61	4
2	31	3	11	5	9	25	12	11	18	41	17	27	21	52	53	3
2	31	2	11	6	9	26	11	11	15	37	20	22	43	47	42	3
1	25	2	10	7	9	26	12	12	15	39	16	30	29	46	59	3
2	29	2	7	5	8	20	9	7	17	33	21	19	43	36	43	4
2	24	2	13	6	11	30	16	14	19	49	19	42	21	47	70	2
2	24	2	12	8	6	26	11	13	20	44	24	47	40	56	43	3
1	26	2	11	7	8	26	9	10	16	35	19	38	41	57	54	3
1	29	2	10	6	10	26	12	8	16	36	22	20	44	43	42	3
2	25	2	11	6	8	25	10	10	14	34	16	26	32	51	42	3
1	32	2	13	6	7	26	11	12	18	41	16	43	30	53	56	3
1	30	3	12	7	11	30	10	11	14	35	18	44	31	48	50	2
1	38	2	14	11	11	36	12	14	18	44	14	37	26	53	58	2
1	28	2	7	7	8	22	11	8	18	37	25	19	53	55	54	4
1	63	3	7	6	7	20	8	9	16	33	24	15	54	28	29	4
1	26	2	6	10	9	25	10	11	18	39	26	29	67	47	40	3
1	24	2	7	5	10	22	10	11	15	36	21	40	43	34	39	4
1	26	2	12	9	10	31	10	12	14	36	22	27	38	48	43	2
2	24	2	8	11	5	24	10	8	16	34	28	28	63	56	23	4
2	27	2	11	10	12	33	9	14	17	40	18	42	31	53	53	2
2	25	2	7	7	10	24	11	11	12	34	21	33	50	33	36	4
